Figure S3: Short, poorly-consolidated sleep in *inc* females.

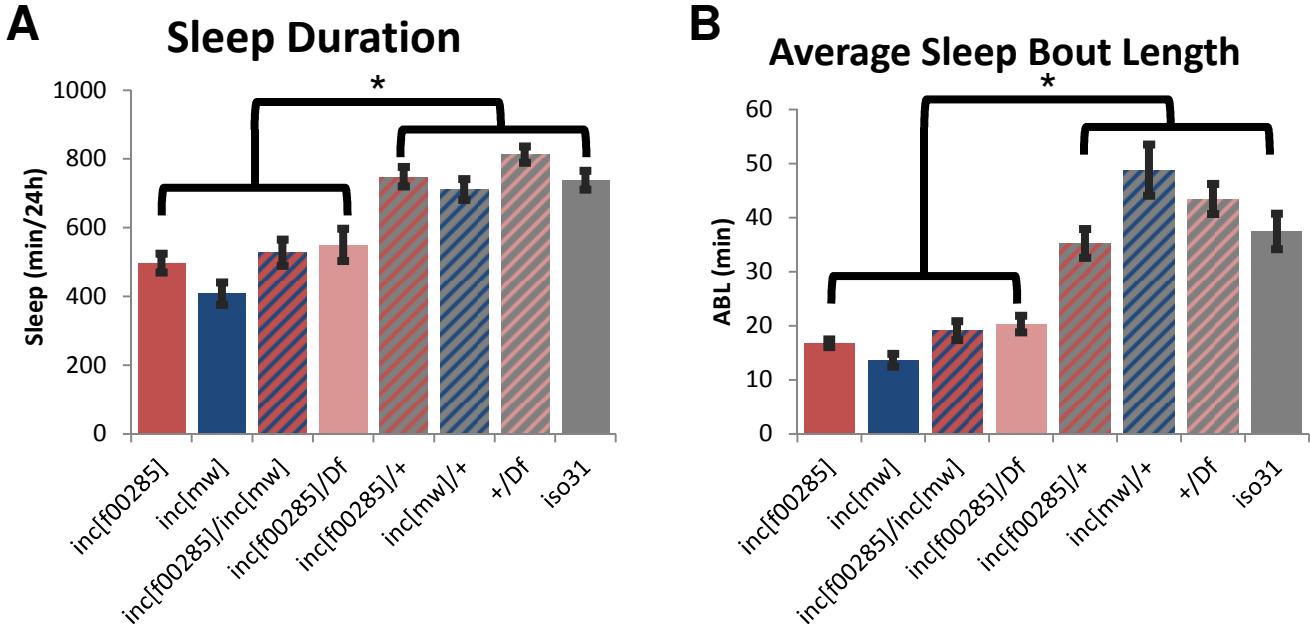

Source: https://storage.googleapis.com/plos-corpus-prod/10.1371/journal.pgen.1003003/1/pgen.1003003.s003.pdf
